Downloaded from <http://asa2.silverchair.com/anesthesiology/article-pdf/77/3/3A/NA667001/0000542-199009001-01110.pdf> by guest on 13 March 2022
